# Supplementary material for: A transdermal device from 2-hydroxyethyl methacrylate grafted carboxymethyl guar gum–multi-walled carbon nanotube composites
Source: Royal Society of Chemistry journal article supplement (doi:10.1039/c3ra47511e), 2014-01-01
Supplement: c3ra47511e1.pdf [file c3ra47511e1.pdf]

**Table 2. Characteristic FTIR transmittance peak and their assignments [wave no. (cm<sup>-1</sup>)]**

| Sample name                        | Functional groups |                                  |      |      |                 |      |       |      |
|------------------------------------|-------------------|----------------------------------|------|------|-----------------|------|-------|------|
|                                    | -OH               | CH <sub>2</sub> ,CH <sub>3</sub> | C=O  | C=C  | CH <sub>2</sub> | C-O  | C-O-C | C-O- |
| CMG                                | 3227              | 2971                             | 1740 |      |                 | 1150 | 1015  |      |
| HEMA                               | 3427              | 2961                             | 1717 | 1637 | 1459            | 1164 | 1077  | 1029 |
| CMG-g-HEMA <sub>1.0/0.75</sub>     | 3298              | 2925                             | 1720 |      |                 | 1120 | 1038  | 998  |
| CMG-g-HEMA <sub>1.0/0.75/0.5</sub> |                   |                                  | 1740 |      |                 |      |       |      |
| CMG-g-HEMA <sub>1.0/0.75/1.0</sub> |                   |                                  | 1713 |      |                 |      |       |      |
| CMG-g-HEMA <sub>1.0/0.75/2.0</sub> |                   |                                  | 1730 |      |                 |      |       |      |
| CMG-g-HEMA <sub>1.0/0.75/3.0</sub> |                   |                                  | 1737 |      |                 |      |       |      |
